# Supplementary material
Source: publisher site journal article supplement (https://www.spandidos-publications.com/2399/downloadSupplementary)
Supplement: Supplementary file 1 [file downloadSupplementary]

## Sheet: Sheet1
Table SII. Histone modification analysis of single nucleotide polymorphisms.
A, rs142136033
Method	Location	Chromatin function	Tissue
ChromHMM	chr7:55159200..55170200	Enhancers	Fetal Muscle Leg
ChromHMM	chr7:55163000..55170200	Genic enhancers	Foreskin Keratinocyte Primary Cells skin03
ChromHMM	chr7:55163600..55168800	Enhancers	Breast Myoepithelial Primary Cells
ChromHMM	chr7:55164400..55168600	Enhancers	IMR90 fetal lung fibroblasts Cell Line
ChromHMM	chr7:55163400..55174600	Genic enhancers	A549 EtOH 0.02pct Lung Carcinoma Cell Line
ChromHMM	chr7:55162000..55175400	Genic enhancers	HMEC Mammary Epithelial Primary Cells
ChromHMM	chr7:55166600..55168200	Enhancers	Brain Angular Gyrus
ChromHMM	chr7:55166800..55168200	Flanking Active TSS	Foreskin Fibroblast Primary Cells skin01
ChromHMM	chr7:55166600..55168400	Enhancers	Psoas Muscle
ChromHMM	chr7:55166600..55168400	Enhancers	HSMM cell derived Skeletal Muscle Myotubes Cell Line
ChromHMM	chr7:55166600..55168200	Enhancers	Osteoblast Primary Cells
ChromHMM	chr7:55167200..55168400	Enhancers	H1 Derived Mesenchymal Stem Cells
ChromHMM	chr7:55167200..55168200	Enhancers	H1 Derived Neuronal Progenitor Cultured Cells
ChromHMM	chr7:55167000..55168200	Genic enhancers	NHEK-Epidermal Keratinocyte Primary Cells
ChromHMM	chr7:55165800..55170200	Repressed PolyComb	Primary hematopoietic stem cells G-CSF-mobilized Male
ChromHMM	chr7:55165800..55170200	Enhancers	Fetal Stomach
ChromHMM	chr7:55166600..55168600	Enhancers	Fetal Brain Male
ChromHMM	chr7:55166600..55168800	Enhancers	Muscle Satellite Cultured Cells
ChromHMM	chr7:55166600..55169000	Enhancers	Fetal Adrenal Gland
ChromHMM	chr7:55166600..55169400	Enhancers	Adipose Nuclei
ChromHMM	chr7:55166600..55170200	Repressed PolyComb	Primary hematopoietic stem cells G-CSF-mobilized Female
ChromHMM	chr7:55166600..55170200	Enhancers	Esophagus
ChromHMM	chr7:55166600..55170200	Enhancers	Right Atrium
ChromHMM	chr7:55166800..55168800	Enhancers	Fetal Brain Female
ChromHMM	chr7:55166800..55169000	Enhancers	Placenta
ChromHMM	chr7:55166800..55169600	Enhancers	Placenta Amnion
ChromHMM	chr7:55164800..55168200	Enhancers	NHLF Lung Fibroblast Primary Cells
ChromHMM	chr7:55167200..55168600	Enhancers	Spleen
ChromHMM	chr7:55167200..55169000	Enhancers	Breast variant Human Mammary Epithelial Cells (vHMEC)
ChromHMM	chr7:55167200..55169000	Enhancers	Fetal Thymus
ChromHMM	chr7:55167200..55170000	Enhancers	Left Ventricle
ChromHMM	chr7:55167200..55170000	Enhancers	Lung
ChromHMM	chr7:55167200..55170000	Enhancers	Right Ventricle
ChromHMM	chr7:55167200..55170200	Enhancers	Pancreas
ChromHMM	chr7:55167200..55170200	Enhancers	Stomach Mucosa
ChromHMM	chr7:55167400..55169400	Enhancers	Brain Dorsolateral Prefrontal Cortex
ChromHMM	chr7:55167400..55169600	Enhancers	Brain Anterior Caudate
ChromHMM	chr7:55167600..55170200	Strong transcription	Fetal Intestine Small
ChromHMM	chr7:55167800..55169200	Enhancers	Mesenchymal Stem Cell Derived Adipocyte Cultured Cells
ChromHMM	chr7:55167800..55169600	Enhancers	Fetal Heart
ChromHMM	chr7:55167800..55169800	Enhancers	Ovary
ChromHMM	chr7:55168000..55169400	Enhancers	Brain Substantia Nigra
ChromHMM	chr7:55168000..55170000	Genic enhancers	Foreskin Fibroblast Primary Cells skin02
ChromHMM	chr7:55167400..55168200	Enhancers	Fetal Muscle Trunk
ChromHMM	chr7:55167400..55168200	Enhancers	Foreskin Keratinocyte Primary Cells skin02
ChromHMM	chr7:55167400..55169000	Enhancers	Brain Cingulate Gyrus
ChromHMM	chr7:55167600..55168200	Flanking Active TSS	Brain Inferior Temporal Lobe
ChromHMM	chr7:55167600..55168200	Enhancers	ES-I3 Cell Line
ChromHMM	chr7:55167600..55168800	Enhancers	hESC Derived CD56+ Mesoderm Cultured Cells
ChromHMM	chr7:55167800..55169000	Enhancers	NHDF-Ad Adult Dermal Fibroblast Primary Cells
ChromHMM	chr7:55168000..55168800	Enhancers	HSMM Skeletal Muscle Myoblasts Cell Line
ChromHMM	chr7:55168000..55168800	Enhancers	Skeletal Muscle Female
ChromHMM	chr7:55168000..55168800	Enhancers	Adipose Derived Mesenchymal Stem Cell Cultured Cells
ChromHMM	chr7:55168000..55169000	Enhancers	Aorta
ChromHMM	chr7:55167800..55168200	Enhancers	Mesenchymal Stem Cell Derived Chondrocyte Cultured Cells
ChromHMM	chr7:55167800..55168200	Genic enhancers	Cortex derived primary cultured neurospheres
ChromHMM	chr7:55167800..55168200	Flanking Active TSS	Brain Hippocampus Middle
ChromHMM	chr7:55167800..55168400	Flanking Active TSS	Brain Germinal Matrix
ChromHMM	chr7:55167800..55168400	Flanking Active TSS	Fetal Lung
ChromHMM	chr7:55167800..55168400	Flanking Active TSS	Skeletal Muscle Male
ChromHMM	chr7:55168000..55168200	Enhancers	NH-A Astrocytes Primary Cells
ChromHMM	chr7:55168000..55168400	Enhancers	Stomach Smooth Muscle
B, rs870064
Method	Location	Chromatin function	Tissue
ChromHMM	chr1:36948400..36953800	Flanking Active TSS	Primary neutrophils from peripheral blood
ChromHMM	chr1:36948800..36956000	Enhancers	Placenta
ChromHMM	chr1:36951200..36959400	Repressed PolyComb	IMR90 fetal lung fibroblasts Cell Line
ChromHMM	chr1:36952000..36956200	Enhancers	K562 Leukemia Cell Line
ChromHMM	chr1:36952000..36957000	Enhancers	Fetal Thymus
ChromHMM	chr1:36952800..36955400	Enhancers	Primary monocytes from peripheral blood
ChromHMM	chr1:36951000..36955000	Repressed PolyComb	Foreskin Fibroblast Primary Cells skin01
ChromHMM	chr1:36951200..36955000	Enhancers	Primary hematopoietic stem cells short term culture
ChromHMM	chr1:36951200..36953600	Flanking Active TSS	Monocytes-CD14+ RO01746 Primary Cells
ChromHMM	chr1:36951200..36953600	Enhancers	Primary hematopoietic stem cells G-CSF-mobilized Male
ChromHMM	chr1:36951200..36953800	Enhancers	Primary Natural Killer cells from peripheral blood
ChromHMM	chr1:36951200..36954200	Repressed PolyComb	Bone Marrow Derived Cultured Mesenchymal Stem Cells
ChromHMM	chr1:36951400..36953600	Enhancers	Primary B cells from peripheral blood
ChromHMM	chr1:36951800..36953600	Enhancers	Fetal Intestine Small
ChromHMM	chr1:36951800..36954800	Enhancers	Fetal Intestine Large
ChromHMM	chr1:36952000..36953000	Enhancers	Adipose Nuclei
ChromHMM	chr1:36952000..36953000	Repressed PolyComb	Primary T cells from peripheral blood
ChromHMM	chr1:36952000..36954800	Enhancers	Primary hematopoietic stem cells
ChromHMM	chr1:36952200..36953800	Enhancers	Pancreas
ChromHMM	chr1:36952400..36954800	Enhancers	Primary B cells from cord blood
ChromHMM	chr1:36952200..36953000	Flanking Active TSS	HeLa-S3 Cervical Carcinoma Cell Line
ChromHMM	chr1:36952200..36953800	Enhancers	Stomach Mucosa
ChromHMM	chr1:36952400..36954200	Repressed PolyComb	NHLF Lung Fibroblast Primary Cells
ChromHMM	chr1:36952600..36953200	Enhancers	Spleen
ChromHMM	chr1:36952600..36953800	Enhancers	Liver
ChromHMM	chr1:36952600..36954000	Enhancers	A549 EtOH 0.02pct Lung Carcinoma Cell Line
ChromHMM	chr1:36952800..36954000	Enhancers	Gastric
ChromHMM	chr1:36952800..36953000	Enhancers	Duodenum Mucosa
ChromHMM	chr1:36952800..36953000	Enhancers	Rectal Mucosa Donor 31
ChromHMM	chr1:36952600..36955000	Enhancers	HepG2 Hepatocellular Carcinoma Cell Line
C, rs141452045
Method	Location	Chromatin function	Tissue
ChromHMM	chr6:152415000..152425600	Strong transcription	Liver
ChromHMM	chr6:152415000..152416200	Genic enhancers	Foreskin Keratinocyte Primary Cells skin02
ChromHMM	chr6:152414600..152415600	Enhancers	H1 BMP4 Derived Mesendoderm Cultured Cells
ChromHMM	chr6:152415000..152419600	Enhancers	Adipose Derived Mesenchymal Stem Cell Cultured Cells
ChromHMM	chr6:152411000..152419400	Enhancers	Foreskin Fibroblast Primary Cells skin01
D, rs117153772
Method	Location	Chromatin function	Tissue
ChromHMM	chr8:128919800..128921800	Enhancers	ES-WA7 Cell Line
ChromHMM	chr8:128918800..128920600	Enhancers	H9 Derived Neuronal Progenitor Cultured Cells
ChromHMM	chr8:128918800..128921200	Enhancers	Primary T cells from peripheral blood
ChromHMM	chr8:128919400..128920600	Flanking Active TSS	Foreskin Fibroblast Primary Cells skin02
ChromHMM	chr8:128918800..128920600	Enhancers	Fetal Brain Female
ChromHMM	chr8:128920400..128920600	Flanking Active TSS	Bone Marrow Derived Cultured Mesenchymal Stem Cells
ChromHMM	chr8:128918400..128924800	Enhancers	Adipose Derived Mesenchymal Stem Cell Cultured Cells
ChromHMM	chr8:128920000..128923200	Enhancers	Breast Myoepithelial Primary Cells
ChromHMM	chr8:128920200..128923200	Enhancers	Mesenchymal Stem Cell Derived Adipocyte Cultured Cells
ChromHMM	chr8:128920200..128925000	Enhancers	IMR90 fetal lung fibroblasts Cell Line
ChromHMM	chr8:128918400..128924600	Enhancers	Breast variant Human Mammary Epithelial Cells (vHMEC)
ChromHMM	chr8:128918600..128921000	Enhancers	Primary hematopoietic stem cells short term culture
ChromHMM	chr8:128918400..128920600	Enhancers	Primary hematopoietic stem cells G-CSF-mobilized Female
ChromHMM	chr8:128919200..128923200	Enhancers	K562 Leukemia Cell Line
ChromHMM	chr8:128916600..128921600	Enhancers	H9 Cell Line
ChromHMM	chr8:128916600..128922200	Enhancers	iPS DF 19.11 Cell Line
ChromHMM	chr8:128916600..128924400	Enhancers	HUES6 Cell Line
ChromHMM	chr8:128917000..128926200	Enhancers	iPS-15b Cell Line
ChromHMM	chr8:128917400..128922000	Enhancers	iPS-18 Cell Line
ChromHMM	chr8:128917400..128924400	Enhancers	HUES48 Cell Line
ChromHMM	chr8:128917800..128924200	Enhancers	H1 Cell Line
ChromHMM	chr8:128918000..128922000	Enhancers	HUES64 Cell Line
ChromHMM	chr8:128918000..128924200	Enhancers	H1 BMP4 Derived Trophoblast Cultured Cells
ChromHMM	chr8:128918200..128922400	Enhancers	Cortex derived primary cultured neurospheres
ChromHMM	chr8:128918200..128921000	Enhancers	Foreskin Keratinocyte Primary Cells skin02
ChromHMM	chr8:128916800..128923600	Enhancers	Foreskin Keratinocyte Primary Cells skin03
ChromHMM	chr8:128918000..128920600	Enhancers	Foreskin Melanocyte Primary Cells skin03
ChromHMM	chr8:128918000..128922600	Enhancers	Fetal Adrenal Gland
ChromHMM	chr8:128917400..128925800	Enhancers	Ovary
ChromHMM	chr8:128918000..128922400	Enhancers	Spleen
ChromHMM	chr8:128914200..128925800	Enhancers	ES-I3 Cell Line
ChromHMM	chr8:128914800..128922600	Enhancers	iPS-20b Cell Line
ChromHMM	chr8:128919800..128920600	Enhancers	Brain Angular Gyrus
ChromHMM	chr8:128919600..128920600	Enhancers	Brain Anterior Caudate
ChromHMM	chr8:128919600..128920600	Flanking Active TSS	A549 EtOH 0.02pct Lung Carcinoma Cell Line
ChromHMM	chr8:128920000..128920600	Enhancers	Primary hematopoietic stem cells G-CSF-mobilized Male
ChromHMM	chr8:128920000..128923600	Enhancers	Foreskin Melanocyte Primary Cells skin01
ChromHMM	chr8:128920000..128924600	Enhancers	NHDF-Ad Adult Dermal Fibroblast Primary Cells
ChromHMM	chr8:128920200..128920600	Strong transcription	HepG2 Hepatocellular Carcinoma Cell Line
ChromHMM	chr8:128920200..128920800	Enhancers	Foreskin Fibroblast Primary Cells skin01
ChromHMM	chr8:128920200..128921600	Enhancers	Muscle Satellite Cultured Cells
ChromHMM	chr8:128920200..128922000	Enhancers	Mesenchymal Stem Cell Derived Chondrocyte Cultured Cells
ChromHMM	chr8:128920200..128923600	Strong transcription	GM12878 Lymphoblastoid Cell Line
ChromHMM	chr8:128920200..128924000	Enhancers	HSMM Skeletal Muscle Myoblasts Cell Line
ChromHMM	chr8:128920200..128924200	Enhancers	NHLF Lung Fibroblast Primary Cells
ChromHMM	chr8:128920200..128924200	Enhancers	H9 Derived Neuron Cultured Cells
ChromHMM	chr8:128920200..128924600	Enhancers	HSMM cell derived Skeletal Muscle Myotubes Cell Line
ChromHMM	chr8:128920200..128924800	Enhancers	Osteoblast Primary Cells
ChromHMM	chr8:128920200..128924800	Enhancers	HMEC Mammary Epithelial Primary Cells
ChromHMM	chr8:128920400..128920600	Flanking Active TSS	HUVEC Umbilical Vein Endothelial Primary Cells
ChromHMM	chr8:128920400..128920600	Flanking Active TSS	NH-A Astrocytes Primary Cells
ChromHMM	chr8:128920400..128920600	Flanking Active TSS	NHEK-Epidermal Keratinocyte Primary Cells
ChromHMM	chr8:128920400..128921200	Genic enhancers	HeLa-S3 Cervical Carcinoma Cell Line
ChromHMM	chr8:128920400..128921600	Enhancers	Primary T helper naive cells from peripheral blood
ChromHMM	chr8:128920400..128922400	Enhancers	Ganglion Eminence derived primary cultured neurospheres
E, rs7115242
Method	Location	Chromatin function	Tissue
ChromHMM	chr11:116902600..116915400	Enhancers	Brain Substantia Nigra
ChromHMM	chr11:116904600..116911400	Enhancers	Brain Anterior Caudate
ChromHMM	chr11:116906200..116913000	Enhancers	Primary T helper 17 cells PMA-I stimulated
ChromHMM	chr11:116907600..116917000	Enhancers	Primary hematopoietic stem cells G-CSF-mobilized Female
ChromHMM	chr11:116903200..116909000	Enhancers	Brain Inferior Temporal Lobe
ChromHMM	chr11:116904600..116909000	Enhancers	Brain Cingulate Gyrus
ChromHMM	chr11:116904600..116909000	Enhancers	Brain Hippocampus Middle
ChromHMM	chr11:116907800..116908600	Enhancers	HSMM cell derived Skeletal Muscle Myotubes Cell Line
ChromHMM	chr11:116907800..116909000	Enhancers	Thymus
ChromHMM	chr11:116907800..116909000	Enhancers	HMEC Mammary Epithelial Primary Cells
ChromHMM	chr11:116906800..116909200	Enhancers	Fetal Adrenal Gland
ChromHMM	chr11:116906800..116909400	Enhancers	Primary T helper naive cells from peripheral blood
ChromHMM	chr11:116906800..116914000	Enhancers	Primary T helper memory cells from peripheral blood 2
ChromHMM	chr11:116907000..116909000	Enhancers	Fetal Intestine Large
ChromHMM	chr11:116907000..116909000	Enhancers	Primary T CD8+ memory cells from peripheral blood
ChromHMM	chr11:116907000..116909400	Enhancers	Primary T helper naive cells from peripheral blood
ChromHMM	chr11:116907000..116916000	Enhancers	Primary T helper cells PMA-I stimulated
ChromHMM	chr11:116907600..116909000	Enhancers	Duodenum Smooth Muscle
ChromHMM	chr11:116907600..116909200	Enhancers	Cortex derived primary cultured neurospheres
ChromHMM	chr11:116907600..116909400	Enhancers	Primary T cells from peripheral blood
ChromHMM	chr11:116907600..116909400	Enhancers	Fetal Thymus
ChromHMM	chr11:116907600..116911200	Enhancers	Primary T helper cells from peripheral blood
ChromHMM	chr11:116907800..116908600	Enhancers	Colonic Mucosa
ChromHMM	chr11:116907800..116908600	Enhancers	Mesenchymal Stem Cell Derived Chondrocyte Cultured Cells
ChromHMM	chr11:116907800..116908600	Enhancers	Mesenchymal Stem Cell Derived Adipocyte Cultured Cells
ChromHMM	chr11:116907800..116908800	Enhancers	Foreskin Fibroblast Primary Cells skin01
ChromHMM	chr11:116907800..116908800	Enhancers	HUES64 Cell Line
ChromHMM	chr11:116907800..116908800	Enhancers	Rectal Mucosa Donor 29
ChromHMM	chr11:116907800..116909000	Enhancers	Pancreatic Islets
ChromHMM	chr11:116907800..116909000	Enhancers	Colon Smooth Muscle
ChromHMM	chr11:116907800..116909000	Enhancers	Primary hematopoietic stem cells
ChromHMM	chr11:116907800..116909000	Enhancers	Adipose Derived Mesenchymal Stem Cell Cultured Cells
ChromHMM	chr11:116907800..116909000	Enhancers	hESC Derived CD56+ Mesoderm Cultured Cells
ChromHMM	chr11:116907800..116909000	Enhancers	Primary T cells effector/memory enriched from peripheral blood
ChromHMM	chr11:116907800..116909200	Enhancers	Fetal Intestine Small
ChromHMM	chr11:116907800..116909400	Enhancers	Foreskin Melanocyte Primary Cells skin03
ChromHMM	chr11:116907800..116909400	Enhancers	Foreskin Keratinocyte Primary Cells skin03
ChromHMM	chr11:116907800..116909600	Enhancers	Liver
ChromHMM	chr11:116907800..116909600	Enhancers	Primary T CD8+ naive cells from peripheral blood
ChromHMM	chr11:116907800..116911200	Enhancers	Primary T helper memory cells from peripheral blood 1
ChromHMM	chr11:116908000..116909200	Enhancers	Ganglion Eminence derived primary cultured neurospheres
ChromHMM	chr11:116908000..116909400	Enhancers	Brain Dorsolateral Prefrontal Cortex
ChromHMM	chr11:116908000..116913600	Enhancers	Brain Angular Gyrus
ChromHMM	chr11:116907800..116908800	Enhancers	Rectal Mucosa Donor 31
ChromHMM	chr11:116907800..116909000	Enhancers	Right Ventricle
ChromHMM	chr11:116907800..116909000	Enhancers	Skeletal Muscle Male
ChromHMM	chr11:116907800..116909000	Enhancers	Skeletal Muscle Female
ChromHMM	chr11:116907800..116908400	Enhancers	Small Intestine
ChromHMM	chr11:116907400..116911200	Enhancers	Dnd41 TCell Leukemia Cell Line
ChromHMM	chr11:116907800..116909200	Enhancers	HUVEC Umbilical Vein Endothelial Primary Cells
ChromHMM	chr11:116908000..116909400	Enhancers	K562 Leukemia Cell Line
ChromHMM	chr11:116908000..116908400	Enhancers	Muscle Satellite Cultured Cells
ChromHMM	chr11:116908000..116908600	Enhancers	Sigmoid Colon
ChromHMM	chr11:116908000..116908600	Enhancers	Breast variant Human Mammary Epithelial Cells (vHMEC)
ChromHMM	chr11:116908000..116908600	Enhancers	Stomach Smooth Muscle
ChromHMM	chr11:116908000..116908800	Enhancers	Rectal Smooth Muscle
ChromHMM	chr11:116908000..116908800	Enhancers	Fetal Lung
ChromHMM	chr11:116908000..116909000	Enhancers	Fetal Kidney
ChromHMM	chr11:116908000..116909000	Enhancers	Fetal Heart
ChromHMM	chr11:116908000..116909000	Enhancers	ES-I3 Cell Line
ChromHMM	chr11:116908000..116909000	Enhancers	H9 Derived Neuron Cultured Cells
ChromHMM	chr11:116908000..116909000	Enhancers	HUES48 Cell Line
ChromHMM	chr11:116908000..116909000	Enhancers	HUES6 Cell Line
ChromHMM	chr11:116908000..116909000	Enhancers	iPS-15b Cell Line
ChromHMM	chr11:116908000..116909000	Enhancers	iPS-20b Cell Line
ChromHMM	chr11:116908000..116909000	Enhancers	A549 EtOH 0.02pct Lung Carcinoma Cell Line
ChromHMM	chr11:116908000..116909000	Enhancers	NHEK-Epidermal Keratinocyte Primary Cells
ChromHMM	chr11:116908200..116908400	Enhancers	Psoas Muscle
ChromHMM	chr11:116908200..116908400	Enhancers	Fetal Muscle Leg
ChromHMM	chr11:116908200..116908400	Bivalent Enhancer	H1 BMP4 Derived Mesendoderm Cultured Cells
ChromHMM	chr11:116908200..116908600	Flanking Active TSS	Duodenum Mucosa
ChromHMM	chr11:116908200..116908600	Enhancers	Primary mononuclear cells from peripheral blood
ChromHMM	chr11:116908200..116908600	Enhancers	Foreskin Keratinocyte Primary Cells skin02
ChromHMM	chr11:116908200..116908600	Enhancers	Foreskin Fibroblast Primary Cells skin02
ChromHMM	chr11:116908200..116908600	Enhancers	H1 Derived Neuronal Progenitor Cultured Cells
ChromHMM	chr11:116908200..116908600	Enhancers	IMR90 fetal lung fibroblasts Cell Line
ChromHMM	chr11:116908200..116908600	Flanking Active TSS	Primary T cells from cord blood
ChromHMM	chr11:116908200..116908800	Enhancers	H1 Cell Line
ChromHMM	chr11:116908200..116909000	Enhancers	Stomach Mucosa
ChromHMM	chr11:116908200..116909000	Enhancers	Right Atrium
ChromHMM	chr11:116908200..116909000	Enhancers	Gastric
ChromHMM	chr11:116908200..116909000	Enhancers	Brain Germinal Matrix
ChromHMM	chr11:116908200..116909000	Enhancers	Adipose Nuclei
ChromHMM	chr11:116908200..116909000	Flanking Active TSS	Primary hematopoietic stem cells G-CSF-mobilized Male
ChromHMM	chr11:116908200..116909000	Enhancers	Primary T regulatory cells from peripheral blood
ChromHMM	chr11:116908200..116909000	Enhancers	H9 Cell Line
ChromHMM	chr11:116908200..116909000	Enhancers	ES-UCSF4 Cell Line
ChromHMM	chr11:116908200..116909000	Enhancers	Primary B cells from cord blood
ChromHMM	chr11:116908200..116908800	Enhancers	HeLa-S3 Cervical Carcinoma Cell Line
ChromHMM	chr11:116908200..116908800	Enhancers	NH-A Astrocytes Primary Cells
ChromHMM	chr11:116908200..116908800	Enhancers	NHDF-Ad Adult Dermal Fibroblast Primary Cells
ChromHMM	chr11:116908200..116908600	Enhancers	NHLF Lung Fibroblast Primary Cells
ChromHMM	chr11:116908200..116908600	Flanking Active TSS	Osteoblast Primary Cells
ChromHMM	chr11:116908200..116909200	Enhancers	Breast Myoepithelial Primary Cells
ChromHMM	chr11:116908200..116909200	Enhancers	Primary Natural Killer cells from peripheral blood
ChromHMM	chr11:116908200..116909400	Enhancers	Primary hematopoietic stem cells short term culture
ChromHMM	chr11:116908200..116909600	Enhancers	Primary B cells from peripheral blood
ChromHMM	chr11:116908200..116909600	Enhancers	Left Ventricle
ChromHMM	chr11:116908200..116909600	Enhancers	GM12878 Lymphoblastoid Cell Line
F, rs143160639
Method	Location	Chromatin function	Tissue
ChromHMM	chr17:76209600..76210600	Active TSS	H1 BMP4 Derived Trophoblast Cultured Cells
ChromHMM	chr17:76209600..76210800	Enhancers	Spleen
ChromHMM	chr17:76209600..76211800	Active TSS	HUES6 Cell Line
ChromHMM	chr17:76209800..76211600	Active TSS	A549 EtOH 0.02pct Lung Carcinoma Cell Line
ChromHMM	chr17:76210000..76211200	Active TSS	iPS DF 6.9 Cell Line
ChromHMM	chr17:76210000..76211200	Flanking Active TSS	Primary hematopoietic stem cells G-CSF-mobilized Male
ChromHMM	chr17:76210000..76211200	Active TSS	Fetal Brain Female
ChromHMM	chr17:76210000..76211200	Flanking Active TSS	Monocytes-CD14+ RO01746 Primary Cells
ChromHMM	chr17:76210000..76211400	Active TSS	iPS-20b Cell Line
ChromHMM	chr17:76210000..76211400	Active TSS	iPS-18 Cell Line
ChromHMM	chr17:76210000..76211400	Active TSS	HUES64 Cell Line
ChromHMM	chr17:76210000..76211400	Active TSS	H9 Cell Line
ChromHMM	chr17:76210000..76211400	Active TSS	hESC Derived CD56+ Ectoderm Cultured Cells
ChromHMM	chr17:76210000..76211400	Active TSS	NHLF Lung Fibroblast Primary Cells
ChromHMM	chr17:76210000..76211600	Active TSS	GM12878 Lymphoblastoid Cell Line
ChromHMM	chr17:76210000..76211600	Active TSS	iPS-15b Cell Line
ChromHMM	chr17:76210000..76211600	Active TSS	hESC Derived CD56+ Mesoderm Cultured Cells
ChromHMM	chr17:76210000..76211800	Active TSS	ES-I3 Cell Line
ChromHMM	chr17:76210000..76212000	Active TSS	HUES48 Cell Line
ChromHMM	chr17:76210000..76212200	Active TSS	HSMM Skeletal Muscle Myoblasts Cell Line
ChromHMM	chr17:76210200..76211200	Active TSS	IMR90 fetal lung fibroblasts Cell Line
ChromHMM	chr17:76210200..76211200	Flanking Active TSS	Primary hematopoietic stem cells G-CSF-mobilized Female
ChromHMM	chr17:76210200..76211200	Flanking Active TSS	Fetal Adrenal Gland
ChromHMM	chr17:76210200..76211400	Active TSS	HeLa-S3 Cervical Carcinoma Cell Line
ChromHMM	chr17:76210200..76211400	Active TSS	iPS DF 19.11 Cell Line
ChromHMM	chr17:76210200..76211400	Active TSS	H1 Cell Line
ChromHMM	chr17:76210200..76211400	Flanking Active TSS	Fetal Muscle Trunk
ChromHMM	chr17:76210200..76211800	Active TSS	H1 BMP4 Derived Mesendoderm Cultured Cells
ChromHMM	chr17:76210200..76212000	Flanking Active TSS	Fetal Thymus
ChromHMM	chr17:76210400..76211200	Flanking Active TSS	Primary hematopoietic stem cells
ChromHMM	chr17:76210400..76211200	Flanking Active TSS	Primary T cells from cord blood
ChromHMM	chr17:76210400..76211200	Active TSS	ES-WA7 Cell Line
ChromHMM	chr17:76210400..76211200	Flanking Active TSS	Duodenum Mucosa
ChromHMM	chr17:76210400..76211800	Active TSS	NHDF-Ad Adult Dermal Fibroblast Primary Cells
ChromHMM	chr17:76209800..76211000	Active TSS	hESC Derived CD184+ Endoderm Cultured Cells
ChromHMM	chr17:76210000..76210800	Active TSS	Bone Marrow Derived Cultured Mesenchymal Stem Cells
ChromHMM	chr17:76210000..76210800	Active TSS	Adipose Derived Mesenchymal Stem Cell Cultured Cells
ChromHMM	chr17:76210000..76210800	Active TSS	Mesenchymal Stem Cell Derived Adipocyte Cultured Cells
ChromHMM	chr17:76210000..76210800	Active TSS	H9 Derived Neuronal Progenitor Cultured Cells
ChromHMM	chr17:76210000..76211000	Active TSS	H1 Derived Neuronal Progenitor Cultured Cells
ChromHMM	chr17:76210000..76211000	Enhancers	Primary B cells from cord blood
ChromHMM	chr17:76210000..76210800	Flanking Active TSS	Primary T helper cells PMA-I stimulated
ChromHMM	chr17:76210000..76210800	Enhancers	Primary T CD8+ naive cells from peripheral blood
ChromHMM	chr17:76210000..76210800	Active TSS	Mesenchymal Stem Cell Derived Chondrocyte Cultured Cells
ChromHMM	chr17:76210000..76210800	Active TSS	Colon Smooth Muscle
ChromHMM	chr17:76210000..76210800	Active TSS	Fetal Kidney
ChromHMM	chr17:76210000..76210800	Enhancers	Left Ventricle
ChromHMM	chr17:76210000..76210800	Enhancers	Lung
ChromHMM	chr17:76210000..76210800	Active TSS	Rectal Smooth Muscle
ChromHMM	chr17:76210000..76210800	Flanking Active TSS	Skeletal Muscle Female
ChromHMM	chr17:76209800..76211000	Enhancers	Stomach Mucosa
ChromHMM	chr17:76210000..76210800	Active TSS	K562 Leukemia Cell Line
ChromHMM	chr17:76210000..76210800	Active TSS	NHEK-Epidermal Keratinocyte Primary Cells
ChromHMM	chr17:76210000..76210800	Active TSS	Osteoblast Primary Cells
ChromHMM	chr17:76210000..76210600	Active TSS	HMEC Mammary Epithelial Primary Cells
ChromHMM	chr17:76210000..76210600	Active TSS	Psoas Muscle
ChromHMM	chr17:76210000..76210600	Active TSS	Fetal Lung
ChromHMM	chr17:76210000..76210600	Active TSS	Brain Anterior Caudate
ChromHMM	chr17:76210000..76210600	Active TSS	Brain Angular Gyrus
ChromHMM	chr17:76210000..76210600	Active TSS	Foreskin Melanocyte Primary Cells skin01
ChromHMM	chr17:76210000..76210600	Active TSS	Foreskin Fibroblast Primary Cells skin01
ChromHMM	chr17:76210000..76210600	Active TSS	Ganglion Eminence derived primary cultured neurospheres
ChromHMM	chr17:76210000..76210600	Active TSS	Primary T cells effector/memory enriched from peripheral blood
ChromHMM	chr17:76210000..76210600	Active TSS	Primary T regulatory cells from peripheral blood
ChromHMM	chr17:76210000..76210600	Active TSS	Primary hematopoietic stem cells short term culture
ChromHMM	chr17:76210200..76210600	Active TSS	H9 Derived Neuron Cultured Cells
ChromHMM	chr17:76210200..76210600	Active TSS	Primary T helper 17 cells PMA-I stimulated
ChromHMM	chr17:76210200..76210600	Active TSS	Muscle Satellite Cultured Cells
ChromHMM	chr17:76210200..76210600	Active TSS	Cortex derived primary cultured neurospheres
ChromHMM	chr17:76210200..76210600	Active TSS	Brain Cingulate Gyrus
ChromHMM	chr17:76210200..76210600	Active TSS	Brain Inferior Temporal Lobe
ChromHMM	chr17:76210200..76210600	Flanking Active TSS	Esophagus
ChromHMM	chr17:76210200..76210600	Active TSS	Fetal Intestine Large
ChromHMM	chr17:76210200..76210600	Active TSS	Fetal Intestine Small
ChromHMM	chr17:76210200..76210600	Active TSS	Fetal Stomach
ChromHMM	chr17:76210200..76210600	Active TSS	Rectal Mucosa Donor 31
ChromHMM	chr17:76210200..76210600	Transcr. at gene 5' and 3'	Right Atrium
ChromHMM	chr17:76210200..76210600	Active TSS	Thymus
ChromHMM	chr17:76210200..76210600	Active TSS	Dnd41 TCell Leukemia Cell Line
ChromHMM	chr17:76210200..76210600	Active TSS	HSMM cell derived Skeletal Muscle Myotubes Cell Line
ChromHMM	chr17:76210200..76210600	Active TSS	HUVEC Umbilical Vein Endothelial Primary Cells
ChromHMM	chr17:76210200..76210600	Active TSS	NH-A Astrocytes Primary Cells
ChromHMM	chr17:76210400..76210600	Active TSS	Breast Myoepithelial Primary Cells
ChromHMM	chr17:76210400..76210600	Active TSS	Primary T helper memory cells from peripheral blood 2
ChromHMM	chr17:76210400..76210600	Flanking Active TSS	Primary T helper naive cells from peripheral blood
ChromHMM	chr17:76210400..76210600	Flanking Active TSS	Adipose Nuclei
ChromHMM	chr17:76210400..76210600	Flanking Active TSS	Brain Hippocampus Middle
ChromHMM	chr17:76210400..76210600	Flanking Active TSS	Brain Dorsolateral Prefrontal Cortex
ChromHMM	chr17:76210400..76210600	Flanking Active TSS	Brain Substantia Nigra
ChromHMM	chr17:76210400..76210600	Active TSS	Fetal Heart
ChromHMM	chr17:76210400..76210600	Flanking Active TSS	Ovary
ChromHMM	chr17:76210400..76210600	Flanking Active TSS	Pancreas
ChromHMM	chr17:76210200..76210800	Flanking Active TSS	Primary B cells from peripheral blood
ChromHMM	chr17:76210200..76210800	Flanking Active TSS	Primary neutrophils from peripheral blood
ChromHMM	chr17:76210200..76210800	Flanking Active TSS	Primary monocytes from peripheral blood
ChromHMM	chr17:76210200..76210800	Flanking Active TSS	Right Ventricle
ChromHMM	chr17:76210200..76211000	Flanking Active TSS	Primary T helper cells from peripheral blood
ChromHMM	chr17:76210200..76211000	Active TSS	ES-UCSF4 Cell Line
ChromHMM	chr17:76210200..76211000	Flanking Active TSS	H1 Derived Mesenchymal Stem Cells
ChromHMM	chr17:76210200..76211000	Flanking Active TSS	Foreskin Fibroblast Primary Cells skin02
ChromHMM	chr17:76210200..76211000	Active TSS	Duodenum Smooth Muscle
ChromHMM	chr17:76210200..76211000	Flanking Active TSS	Fetal Muscle Leg
ChromHMM	chr17:76210200..76211000	Flanking Active TSS	Gastric
ChromHMM	chr17:76210400..76210800	Flanking Active TSS	Primary T helper memory cells from peripheral blood 1
ChromHMM	chr17:76210400..76210800	Flanking Active TSS	Primary T helper naive cells from peripheral blood
ChromHMM	chr17:76210400..76210800	Flanking Bivalent TSS/Enh	Primary T cells from peripheral blood
ChromHMM	chr17:76210400..76210800	Flanking Active TSS	Primary Natural Killer cells from peripheral blood
ChromHMM	chr17:76210400..76210800	Bivalent/Poised TSS	Foreskin Keratinocyte Primary Cells skin02
ChromHMM	chr17:76210400..76210800	Flanking Bivalent TSS/Enh	Foreskin Melanocyte Primary Cells skin03
ChromHMM	chr17:76210400..76210800	Flanking Active TSS	Primary mononuclear cells from peripheral blood
ChromHMM	chr17:76210400..76210800	Flanking Active TSS	Liver
ChromHMM	chr17:76210400..76210800	Enhancers	Fetal Brain Male
ChromHMM	chr17:76210400..76210800	Active TSS	Placenta Amnion
ChromHMM	chr17:76210400..76210800	Flanking Active TSS	Skeletal Muscle Male
ChromHMM	chr17:76210400..76210800	Active TSS	Small Intestine
ChromHMM	chr17:76210400..76210800	Flanking Active TSS	Stomach Smooth Muscle
ChromHMM	chr17:76210400..76211000	Active TSS	Breast variant Human Mammary Epithelial Cells (vHMEC)
ChromHMM	chr17:76210400..76211000	Flanking Active TSS	Primary T CD8+ memory cells from peripheral blood
ChromHMM	chr17:76210400..76211000	Bivalent/Poised TSS	Foreskin Keratinocyte Primary Cells skin03
ChromHMM	chr17:76210400..76211000	Flanking Active TSS	Brain Germinal Matrix
ChromHMM	chr17:76210400..76211000	Flanking Active TSS	Colonic Mucosa
ChromHMM	chr17:76210400..76211000	Flanking Active TSS	Placenta
ChromHMM	chr17:76210400..76211000	Flanking Active TSS	Rectal Mucosa Donor 29
ChromHMM	chr17:76210400..76211000	Flanking Active TSS	Sigmoid Colon
ChromHMM	chr17:76210400..76211000	Bivalent/Poised TSS	HepG2 Hepatocellular Carcinoma Cell Line
G, rs113139165
Method	Location	Chromatin function	Tissue
ChromHMM	chr2:213384200..213387200	Repressed PolyComb	Primary hematopoietic stem cells G-CSF-mobilized Male
ChromHMM	chr2:213384800..213385800	Enhancers	Fetal Heart
H, rs111251321
Method	Location	Chromatin function	Tissue
ChromHMM	chr2:213102400..213105200	Heterochromatin	Primary Natural Killer cells from peripheral blood
